# Supplementary material for: Recombinational Landscape and Population Genomics of Caenorhabditis elegans
Source: PubMed Central journal article supplement (PMC2652117; doi:10.1371/journal.pgen.1000419), 2009-03-13
Supplement: pgen.1000419.s005.pdf [file pgen.1000419.s005.pdf]

Linkage and LD in *C. elegans*

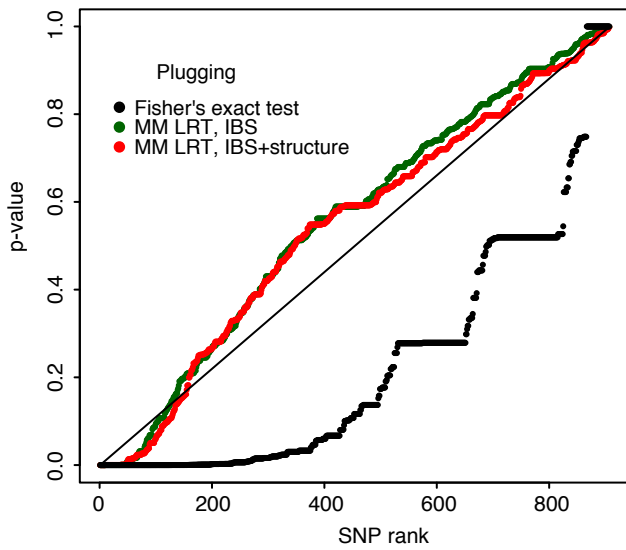

Rockman and Kruglyak

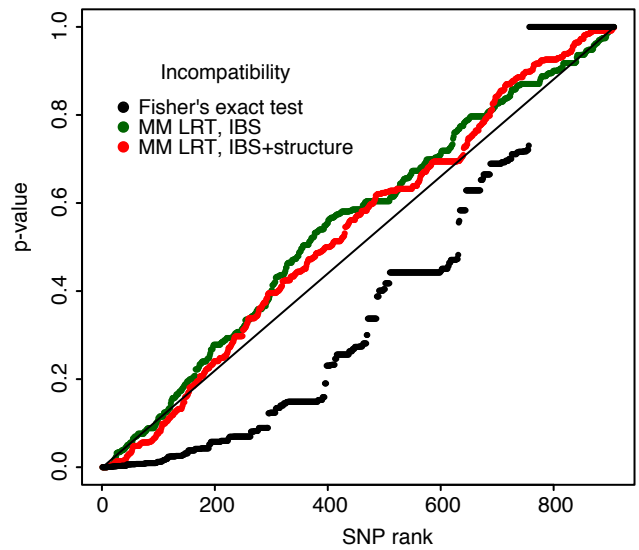

Figure S5
